# Supplementary material for: Development and Temporal Validation of an Electronic Medical Record-Based Insomnia Prediction Model Using Data from a Statewide Health Information Exchange
Source: MDPI journal article supplement (doi:10.3390/jcm12093286), 2023-05-05

**Figure S1.** Calibration curve for 2011–2017 XGBoost model on holdout data (-1 to -365 days surveillance period)

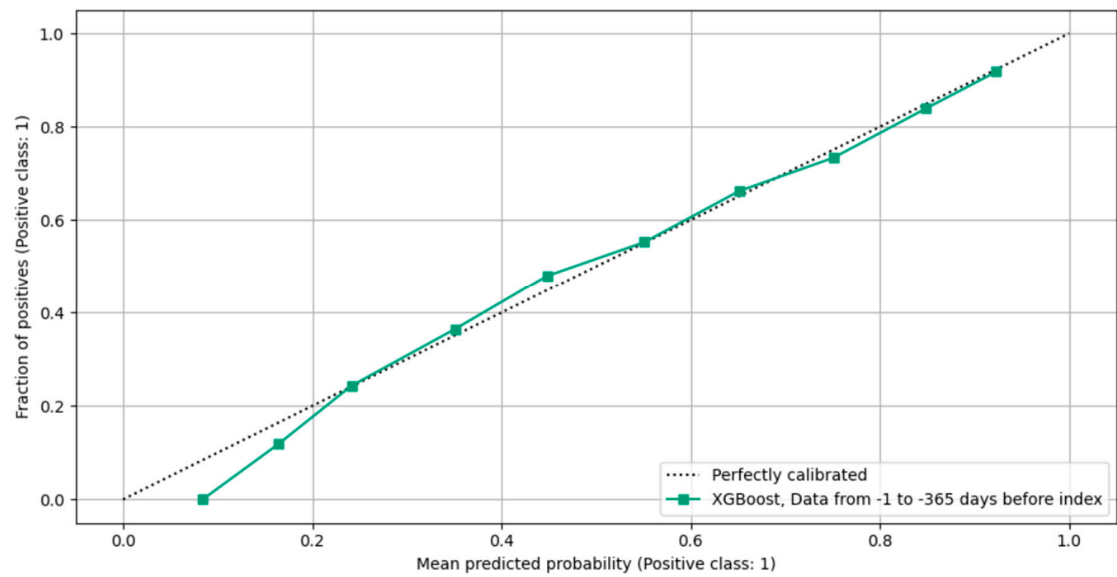

**Figure S2.** Calibration curve for 2011–2017 XGBoost model on holdout data (-180 to -365 days surveillance period)

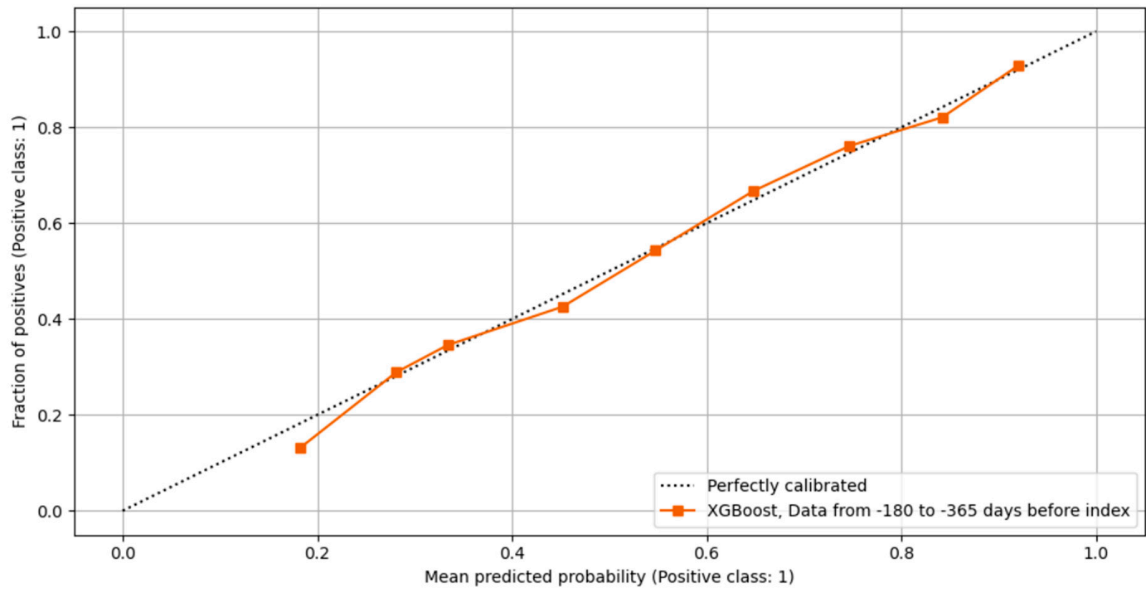

Supplement: s1 [file s1]
